# Supplementary material for: Royal Jelly Protects against Epidermal Stress through Upregulation of the NQO1 Expression
Source: MDPI journal article supplement (doi:10.3390/ijms222312973), 2021-11-30
Supplement: s1 [file s1]

Supplemental Table S1. Antibodies used in this study.

| Antibodies                                                                          | Supplier | Cat.    | Usage                |
|-------------------------------------------------------------------------------------|----------|---------|----------------------|
| Nqo1                                                                                | CST      | #3187   | Western Blotting     |
| $\beta$ -Actin                                                                      | MBL      | M177-3  | Western Blotting     |
| Keratin 14                                                                          | abcam    | ab7800  | Immunohistochemistry |
| Keratin 10                                                                          | abcam    | ab76318 | Immunohistochemistry |
| Nqo1                                                                                | CST      | #62262  | Immunohistochemistry |
| Anti-mouse IgG, HRP-linked Antibody                                                 | CST      | #7076   | Western Blotting     |
| Anti-mouse IgG (H+L), F(ab') <sub>2</sub> Fragment<br>(Alexa Fluor® 555 Conjugate)  | CST      | #4409   | Immunohistochemistry |
| Anti-rabbit IgG (H+L), F(ab') <sub>2</sub> Fragment<br>(Alexa Fluor® 555 Conjugate) | CST      | #4413   | Immunohistochemistry |
| Anti-mouse IgG (H+L), F(ab') <sub>2</sub> Fragment<br>(Alexa Fluor® 488 Conjugate)  | CST      | #4408   | Immunohistochemistry |
| Anti-rabbit IgG (H+L), F(ab') <sub>2</sub> Fragment<br>(Alexa Fluor® 488 Conjugate) | CST      | #4412   | Immunohistochemistry |

Supplemental Table S2. Normal human epidermal keratinocytes used in this study.

| Supplier                   | Sex    | Age | Race      | Tissue  |        | Lot number |
|----------------------------|--------|-----|-----------|---------|--------|------------|
| PromoCell                  | female | 31  | Caucasian | skin    |        |            |
|                            | female | 32  | Caucasian | breast  | Pooled | 433Z033    |
|                            | female | 51  | Caucasian | eyelid  |        |            |
| PromoCell                  | female | 56  | Caucasian | abdomen | Single | 451Z0141   |
| BIOPREDIC<br>International | female | 23  | Caucasian | abdomen | Single | KER110016  |

Supplemental Table S3. The concentration of 10H2DA in royal jelly.

| <b>Royal jelly</b>                       | <b>Lot</b>   | <b>10H2DA (%)</b> | <b>Method</b> |
|------------------------------------------|--------------|-------------------|---------------|
| Lyophilized raw royal jelly              | YDP-M-180120 | 4.65              | HPLC          |
| Lyophilized raw royal jelly              | YDP-M-190801 | 4.86              | HPLC          |
| Lyophilized raw royal jelly              | YDP-M-200225 | 4.58              | HPLC          |
| Lyophilized protease-treated royal jelly | YRP-M-181030 | 4.06              | HPLC          |

Supplemental Table S4. Primer pairs used in this study

| Symbol         | Gene name                                             | Forward, Sequence (5'→3') | Reverse, Sequence (5'→4') |
|----------------|-------------------------------------------------------|---------------------------|---------------------------|
| <i>AHR</i>     | Aryl hydrocarbon receptor                             | TGGTTGTGATGCCAAAGGAAGAA   | ACTGGACCCAAGTCCATCGG      |
| <i>AQP3</i>    | Aquaporin 3                                           | CCGTGACCTTTGCCATGTGCTT    | TTGTGCGCGAAGTGCCAGATTG    |
| <i>CAPN1</i>   | Calpain-1                                             | TTCGAGCCCAACAAGGAGGG      | AGAGCACTTGCTCATCGGGG      |
| <i>CASP14</i>  | Caspase-14                                            | CAGCCCACAAACCATCCCAAC     | GTAGGCGATGTATCCCTCTACCGT  |
| <i>CAT</i>     | Catalase                                              | AATGCTTCAGGGCCGCCTTT      | ACTCGAGCACGGTAGGGACA      |
| <i>CD44</i>    | CD44 molecule                                         | AGTGGTTTGGCAACAGATGGC     | GAGGCTGCAGCTGTCCCTGT      |
| <i>CEMIP</i>   | Cell migration inducing hyaluronidase 1               | GGAGCCGGCCATCATCAGAC      | GGGAAGGTTCCACCACTGGC      |
| <i>CLDN1</i>   | Claudin 1                                             | GTCTTTGACTCCTTGCTGAATCTG  | CACCTCATCGTCTTCCAAGCAC    |
| <i>COL17A1</i> | Collagen type XVII alpha 1 chain                      | CAGGACCTGTCACCACCATC      | CGTACCCCGAAGTCCGTAAG      |
| <i>COL4A1</i>  | Collagen type IV alpha 1 chain                        | GAGTGCCTGGAAAGGACGGG      | GGTGTTCCTGGCAAGCCCAT      |
| <i>CTSH</i>    | Cathepsin H                                           | TCATGGATGTCTAAGCACCGT     | GGTTCCTTCTGTTGTGGGCG      |
| <i>CYP1A1</i>  | Cytochrome P450 family 1 subfamily A member 1         | GATTGAGCACTGTCAGGAGAAGC   | ATGAGGCTCCAGGAGATAGCAG    |
| <i>FNI</i>     | Fibronectin 1                                         | CAGCAGTACGGCCACCAAGA      | ACGGTGTGCTGGTCACAGG       |
| <i>FOXO3</i>   | Forkhead box O3                                       | TCGAGAGCTCCCCGGACAAA      | GGATGGAGTTCTTCCAGCCG      |
| <i>GCLC</i>    | Glutamate-cysteine ligase catalytic subunit           | TTCACACTGCCCGAGGTCAA      | CTTGTTAAGGTACTGAAGCGAGGGT |
| <i>HAS3</i>    | Hyaluronan synthase 3                                 | ACCAACCGAGTCCTGAGCCT      | TGGTTGAGCCACCGGAGGTA      |
| <i>IVL</i>     | Involucrin                                            | CCAGGCCAGGTCCAAGACAT      | CTGGACACTGCGGGTGGTTA      |
| <i>KRT1</i>    | Keratin 1                                             | TGACAAGGTGAGGTTCTTGAG     | AGTTGGTCCACTCTCCTTCGG     |
| <i>KRT10</i>   | Keratin 10                                            | AGTCCCAACTGGCCTTGAAAC     | AGCTGCACACAGTAGCGACC      |
| <i>KRT14</i>   | Keratin 14                                            | TGCCGAGGAATGGTTCTTCACC    | GCAGCTCAATCTCCAGGTTCTG    |
| <i>KRT5</i>    | Keratin 5                                             | GCTGCCTACATGAACAAGGTGG    | ATGGAGAGGACCACTGAGGTGT    |
| <i>LAMA5</i>   | Laminin subunit alpha 5                               | GAGGCTTTGAACCGGGCAGT      | TCCTGCTTCCTTTGCAGGGC      |
| <i>LOR</i>     | Loricrin cornified envelope precursor protein         | GTCTGCGGAGGTGGTTCCTCT     | TGCTGGGTCTGGTGGCAGATC     |
| <i>MMP2</i>    | Matrix metalloproteinase 2                            | TGAGGGCGCTCTGTCTCCTG      | TCAGGTATTGCACTGCCAACTC    |
| <i>NQO 1</i>   | NAD(P)H quinone dehydrogenase 1                       | CCTGCCATTCTGAAAGGCTGGT    | GTGGTGATGGAAAGCACTGCCT    |
| <i>Nrf2</i>    | Nuclear factor, erythroid 2 like 2                    | CCAACTACTCCCAGGTTGCCC     | GTGACTGAAACGTAGCCGAAGA    |
| <i>OCN</i>     | Occludin                                              | ATGGCAAAGTGAATGACAAGCGG   | CTGTAACGAGGCTGCCTGAAGT    |
| <i>SIRT3</i>   | Sirtuin 3                                             | CCACCTGCACAGTCTGCCAA      | CAGCGGCTCCCCAAAGAACA      |
| <i>SOD1</i>    | Superoxide dismutase 1                                | GCACACTGGTGGTCCATGAAA     | CAAGCCAAACGACTTCCAGCG     |
| <i>SOD2</i>    | Superoxide dismutase 2                                | CCCAAAGGGGAGTTGCTGGAA     | CCAAGCCAACCCCAACCTGA      |
| <i>SPTLC1</i>  | Serine palmitoyltransferase long chain base subunit 1 | GCAGTGTTGAAGGAAAAGTGCGG   | CAGTGCTCTCTTCCAGTTGTAGG   |
| <i>TGFB1</i>   | Transforming growth factor beta 1                     | GTTGTGCGGCAGTGGTTGAG      | CCGGTAGTGAACCCGTTGATG     |
| <i>TGM1</i>    | Transglutaminase 1                                    | GAACGACTGCTGGATGAAGAGG    | CTTGATGGACTCCACAGAGCAG    |
| <i>ZO1</i>     | Zonula occludens-1                                    | GTCCAGAATCTCGGAAAAGTGCC   | CTTTCAGCGCACCATACCAACC    |

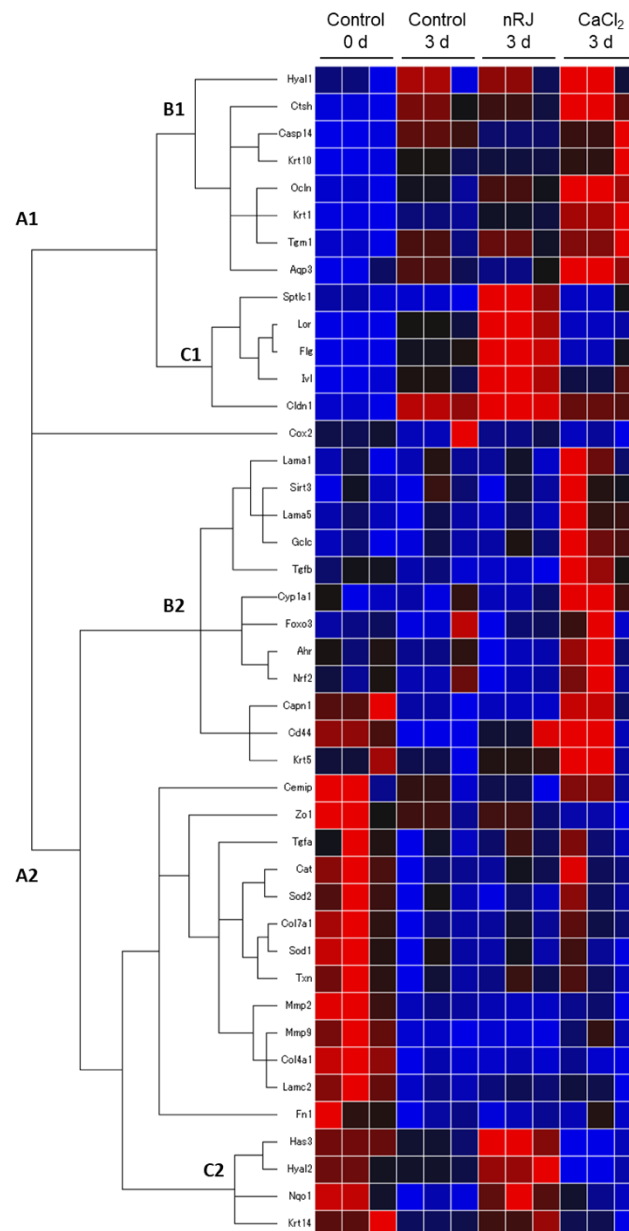

**Supplemental Figure S1. Comparison of the gene expression pattern in keratinocytes following stimulation with RJ or keratinocyte differentiation inducer, CaCl<sub>2</sub>.** Two major clusters, A1 and A2, were observed before (0 d) and after (3 d) stimulation. With CaCl<sub>2</sub>, there were two clusters, B1 and B2. B1 contained the keratinocyte differentiation markers *Krt1* and *Krt10*. On the other hand, nRJ-treated keratinocytes expressed another characteristic of gene expression that was classified into clusters C1 and C2. In cluster C1, both stratum spinosum and granular layer related genes such as *Flg* and *Lvl* were observed.

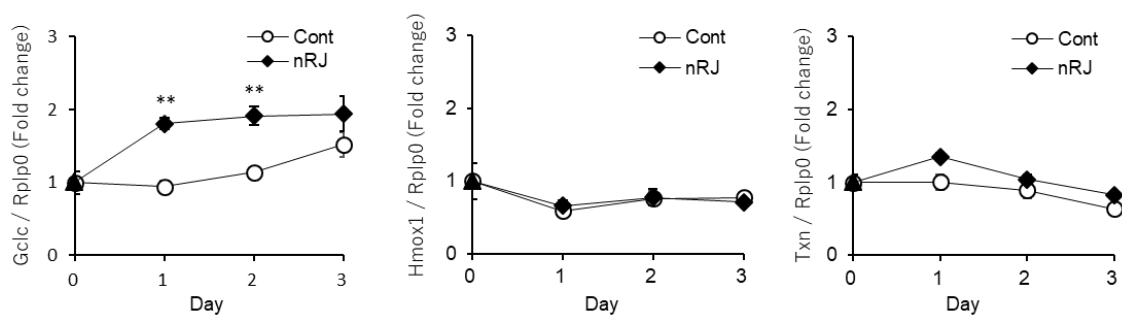

**Supplemental Figure S2. Changes in Nrf2 downstream genes following stimulation with nRJ**  
 Keratinocytes (pooled) were treated with 1 mg/ml nRJ for 3 days. Expression of *Gclc*, *Hmox1*, and *Txn* was analyzed using real-time PCR. Data represent mean  $\pm$  SEM,  $n = 3-4$ , \*\* $p < 0.01$ , vs. Control (Cont), Student's *t*-test.

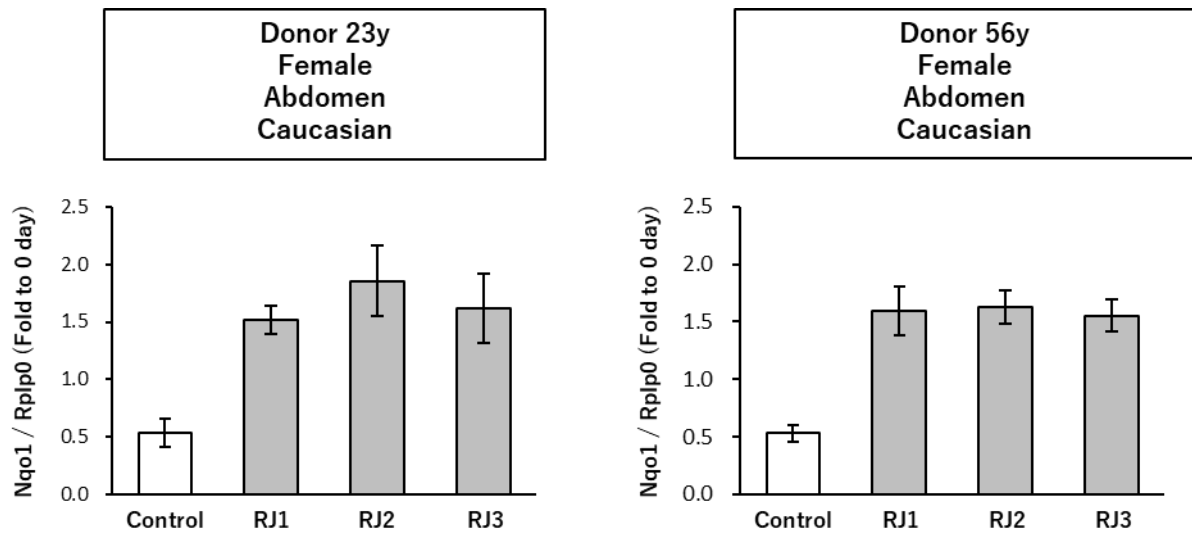

**Supplemental Figure S3. Induction of NQO1 expression in keratinocytes (derived from 23y donor and 56 y donor) was comparable among different lots of nRJ.**

Keratinocytes were treated with 1 mg/ml nRJ (RJ1 Lot YDP-M-180120, RJ2 Lot YDP-M-190801, and RJ3 Lot YDP-M-200225) for 3 days. NQO1 mRNA expression was analyzed by real-time PCR. Data represent the mean  $\pm$  SEM, n=3.
